# Supplementary material for: Relationship between measurement conditions and energy levels in the organic dyes used in dye-sensitized solar cells
Source: Royal Society of Chemistry journal article supplement (doi:10.1039/c5ra14030g), 2015-01-01
Supplement: c5ra14030g1.pdf [file c5ra14030g1.pdf]

## Relationship between measurement conditions and energy levels in the organic dyes used in dye-sensitized solar cells

Valentas Gaidelis<sup>a</sup>, Egidijus Kamarauskas<sup>a</sup>, Tadas Malinauskas<sup>b</sup>, Vytautas Getautis<sup>b</sup>, Robert Send<sup>c</sup>, Henrike Wonneberger<sup>c</sup>, and Ingmar Bruder<sup>c</sup>

<sup>a</sup>Department of Solid State Electronics, Vilnius University, Saulėtekio 9, LT-10222 Vilnius, Lithuania

<sup>b</sup>Department of Organic Chemistry, Kaunas University of Technology, Radvilėnų pl. 19, Kaunas, 50254, Lithuania

<sup>c</sup>trinamiX GmbH, Carl-Bosch-Str.38, Ludwigshafen, 67056, Germany

July 9, 2015

### Supplementary Materials

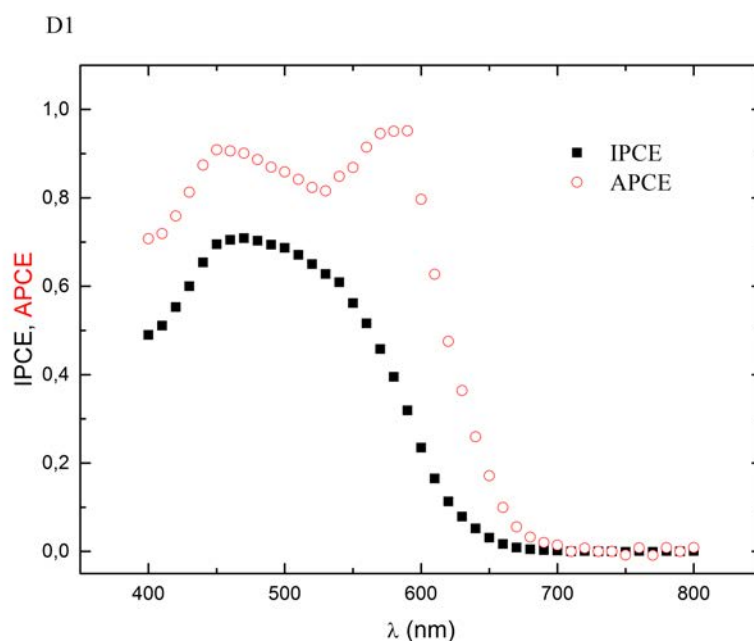

Figure S1: IPCE and APCE of dye D1

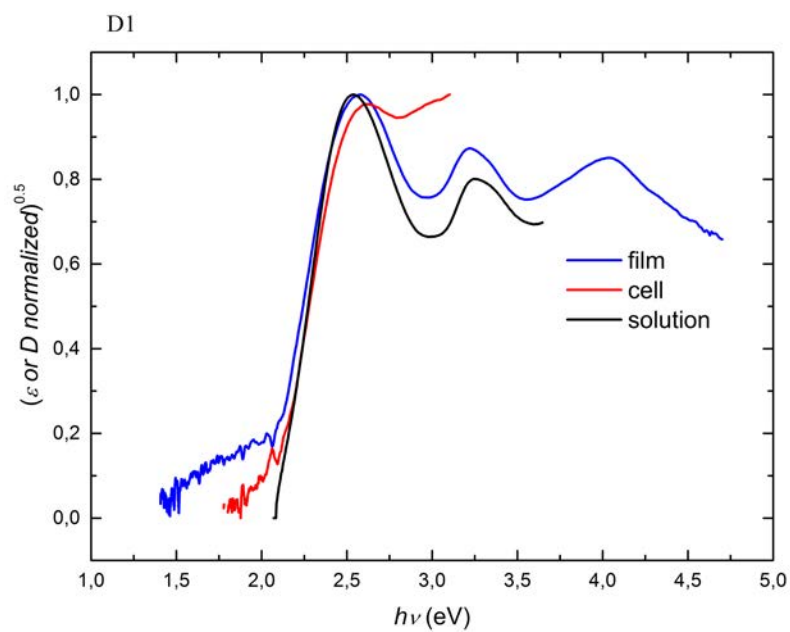

Figure S2: Absorbance spectra of dye D1

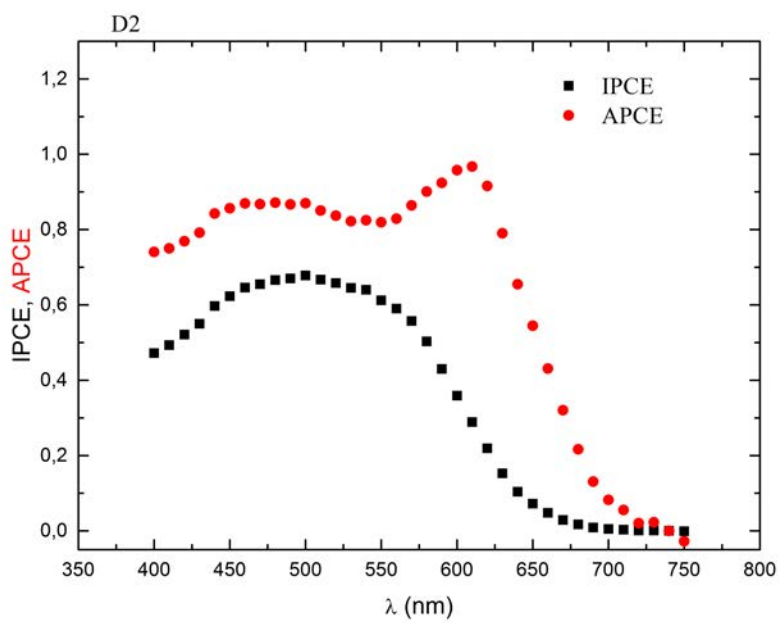

Figure S3: IPCE and APCE of dye D2

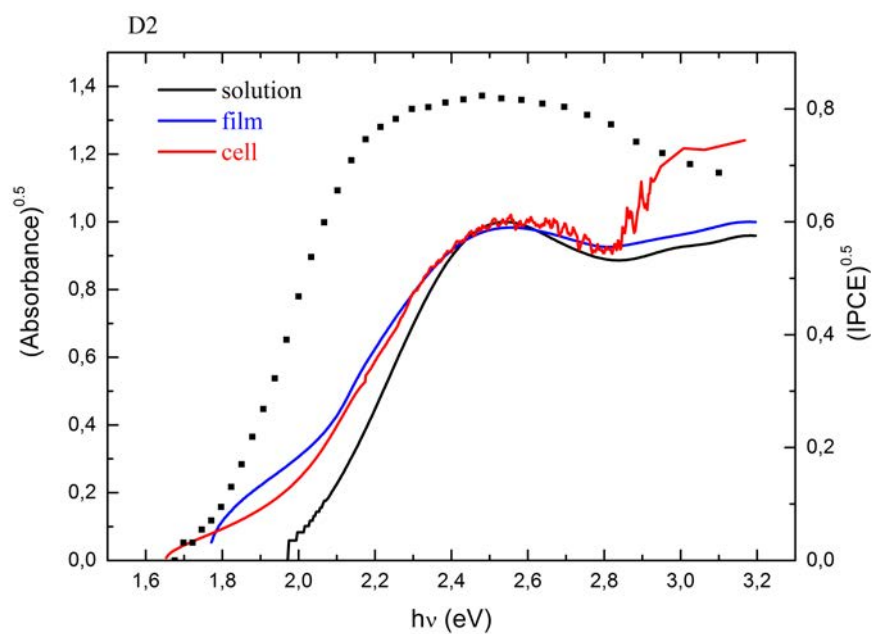

Figure S4: Absorbance and IPCE of dye D2

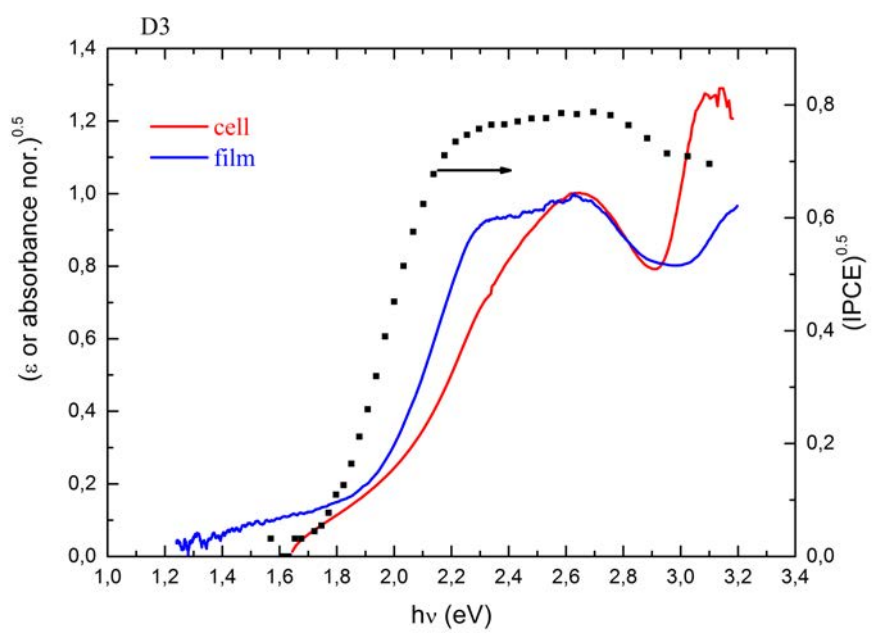

Figure S5: Absorbance and IPCE of dye D3

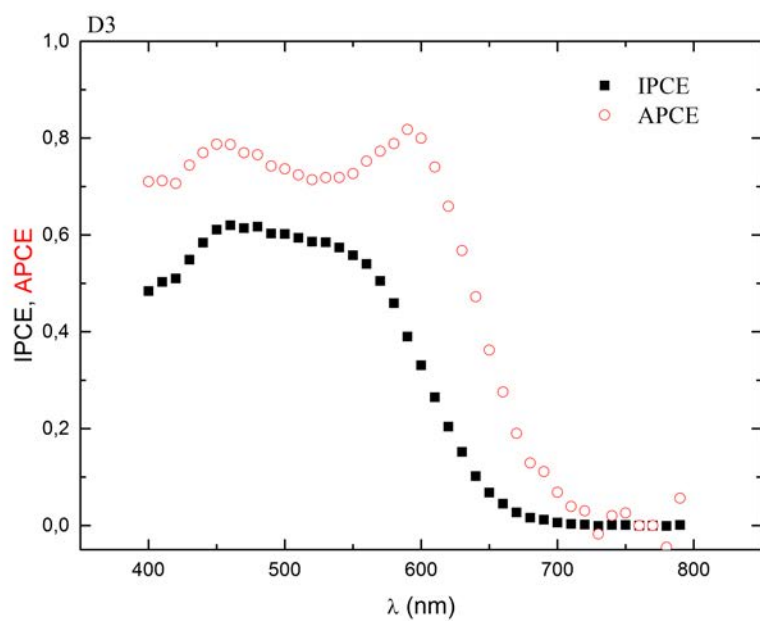

Figure S6: IPCE and APCE of dye D3

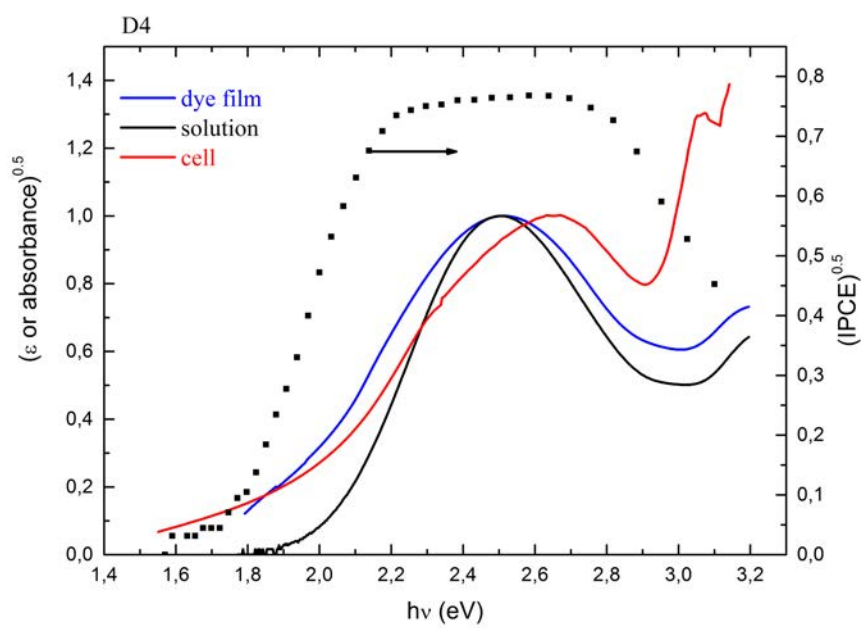

Figure S7: Absorbance and IPCE of dye D4

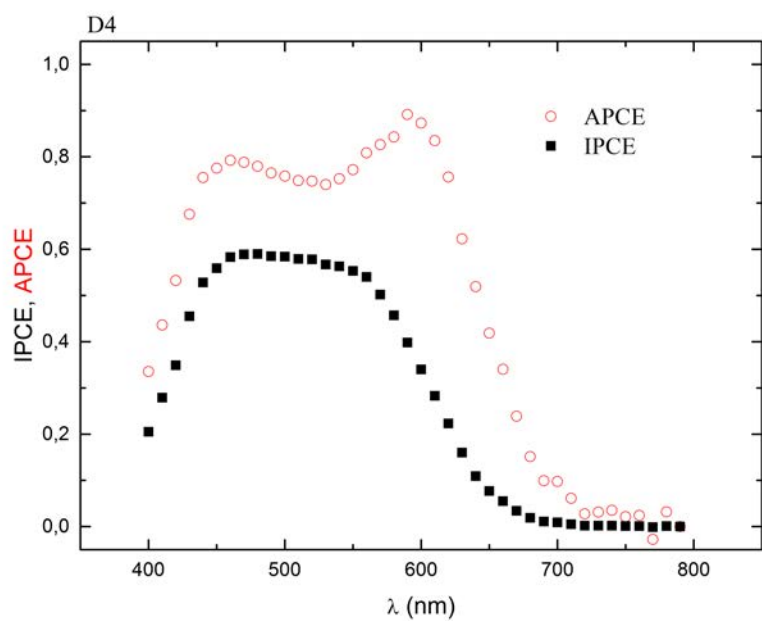

Figure S8: IPCE and IPCE of dye D4

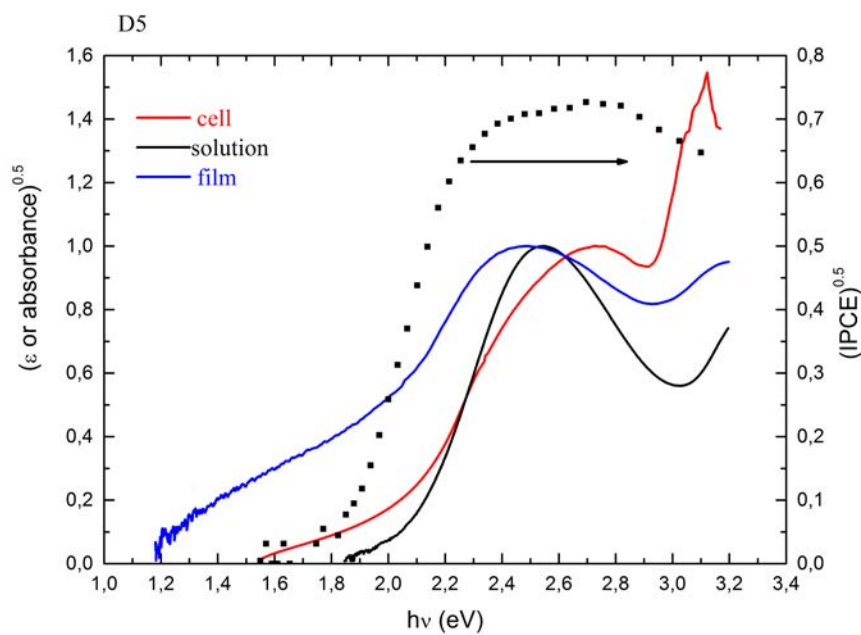

Figure S9: Absorbance and IPCE of dye D5

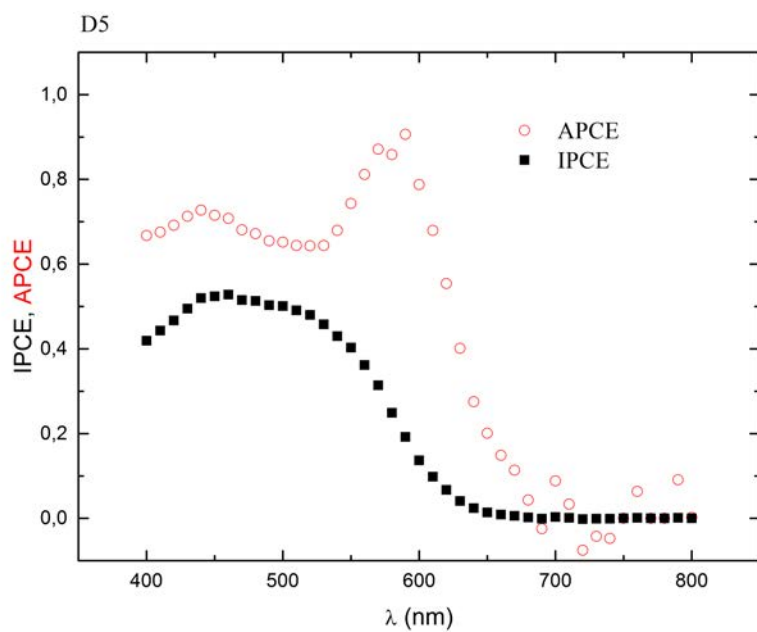

Figure S10: IPCE and APCE of dye D5

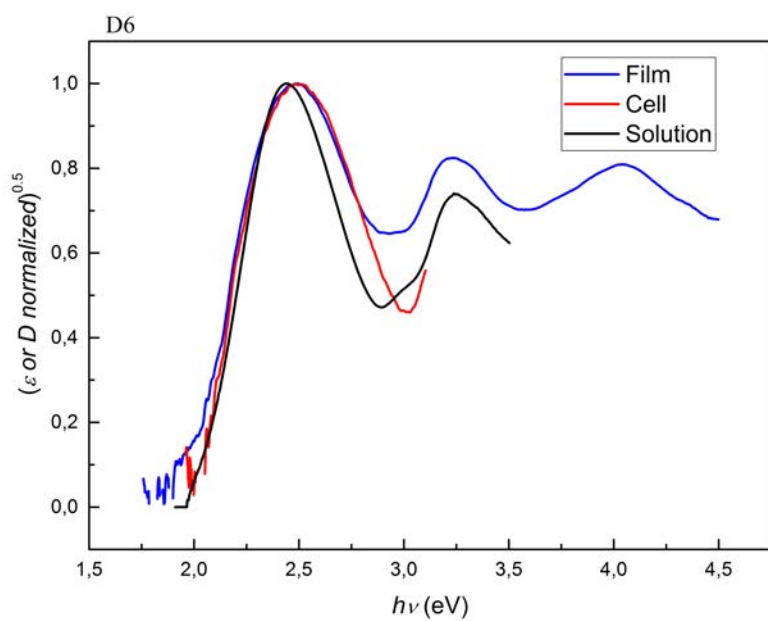

Figure S11: Absorbance spectra of dye D6

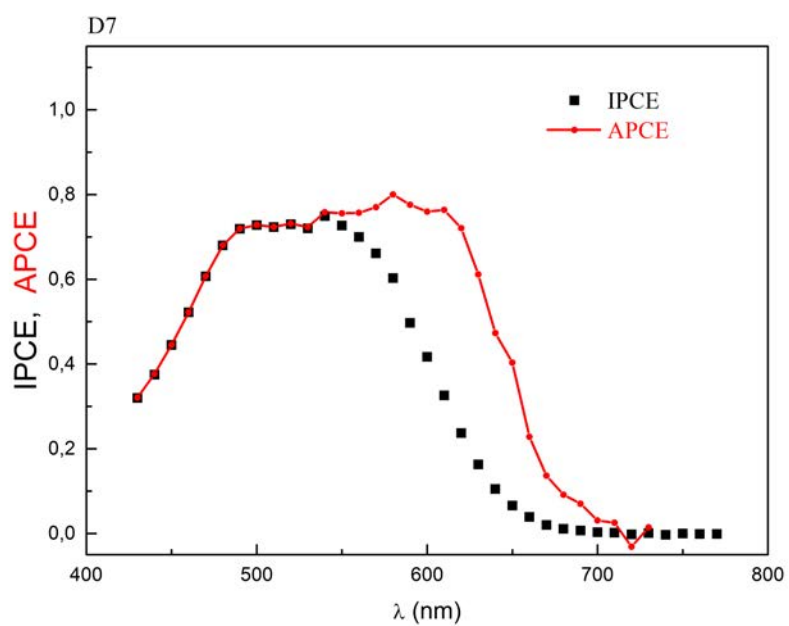

Figure S12: IPCE and APCE of dye D7

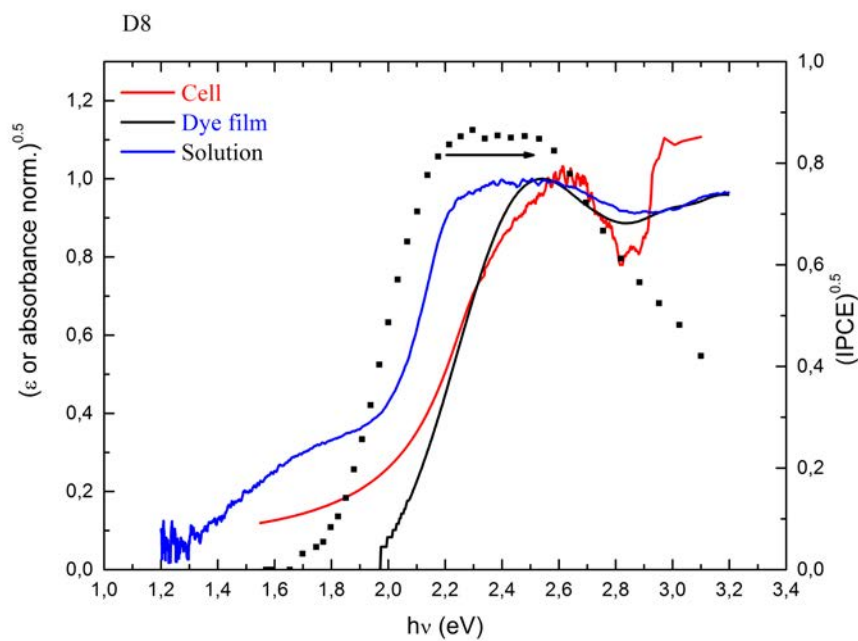

Figure S13: Absorbance and IPCE of dye D8

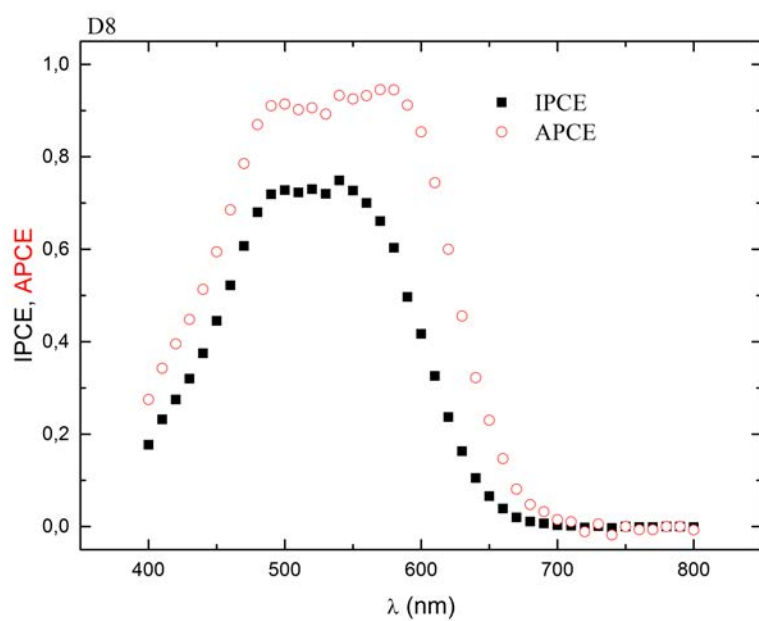

Figure S14: IPCE and IPCE of dye D8

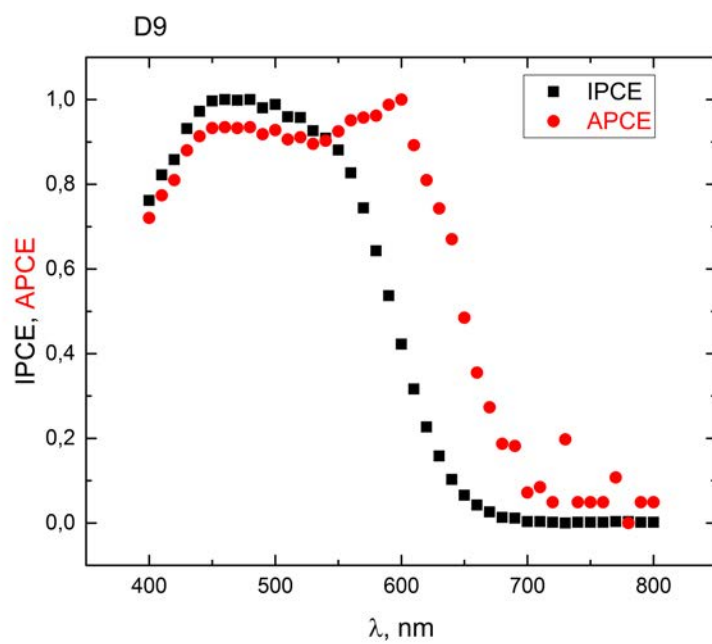

Figure S15: IPCE and IPCE of dye D9



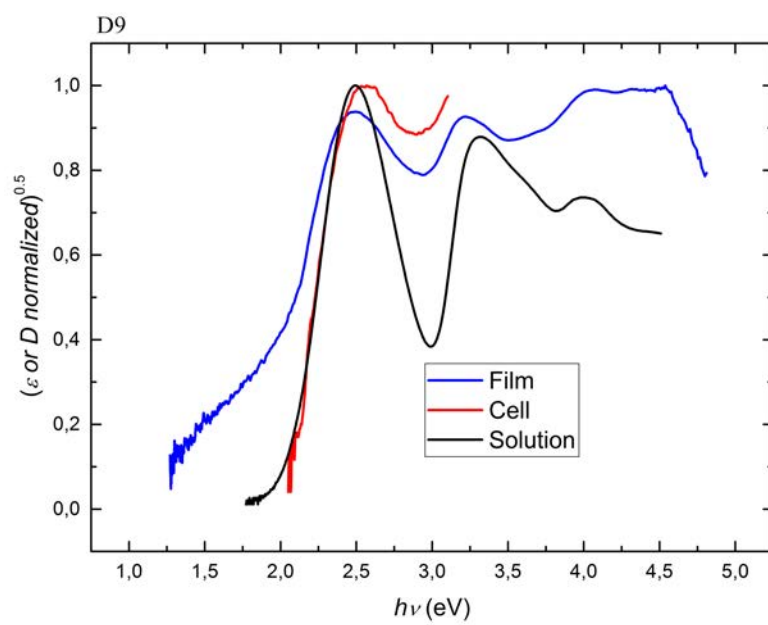

Figure S16: Absorbance spectra of dye D9
